# Supplementary material for: W6+ & Br− codoped Li4Ti5O12 anode with super rate performance for Li-ion batteries
Source: Royal Society of Chemistry journal article supplement (doi:10.1039/c5ta02784e), 2015-01-01
Supplement: c5ta02784e1.pdf [file c5ta02784e1.pdf]

## Supporting information

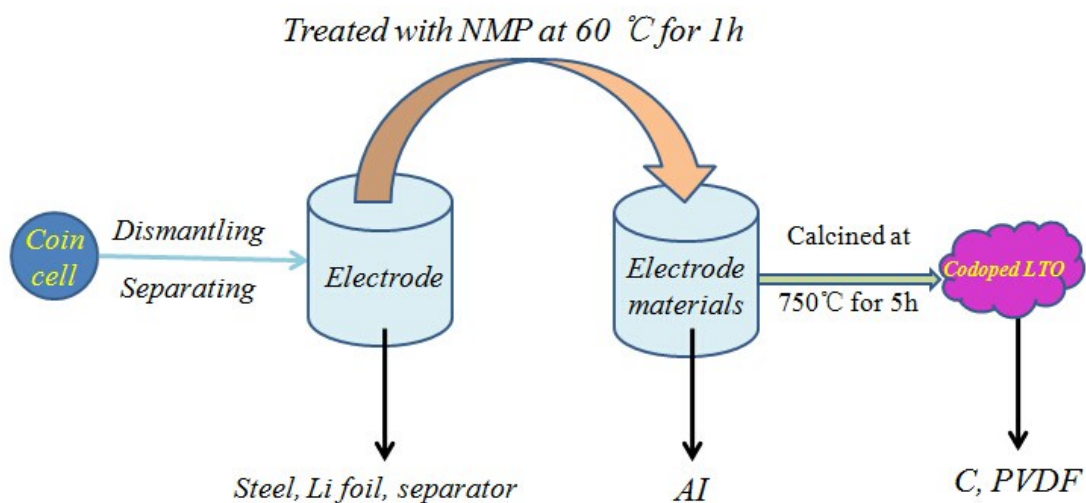

Fig. 1S Schematic illustration of the electrode materials for SEM after cycling.

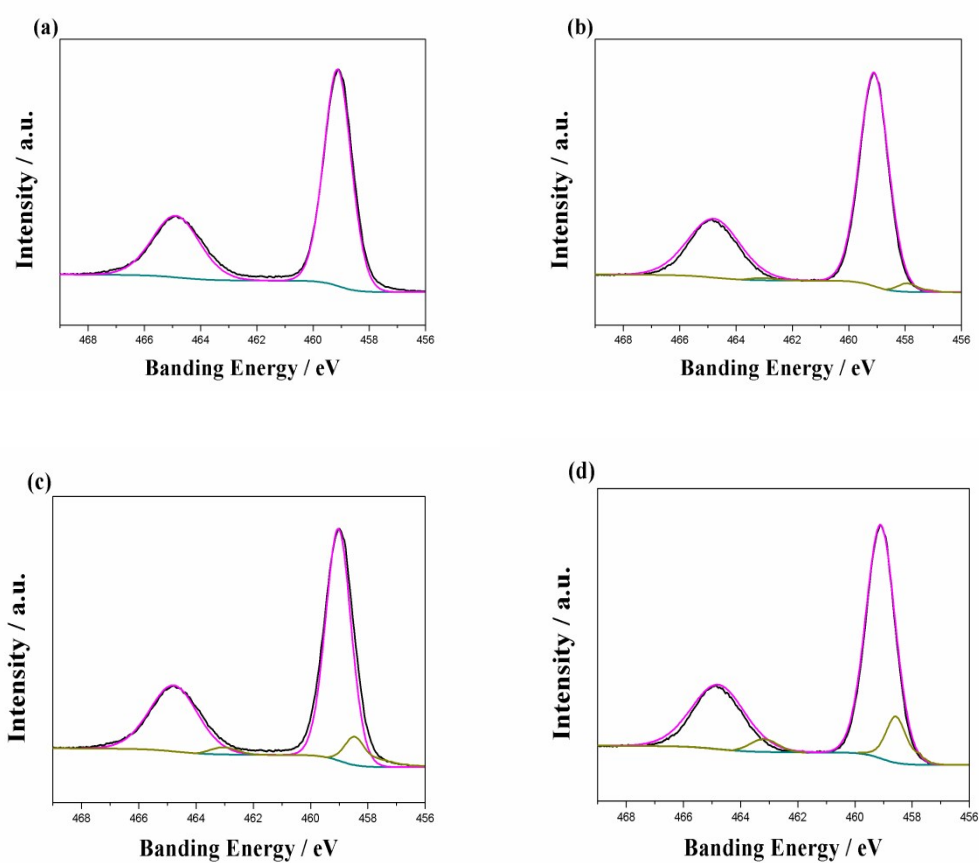

Fig. 2S Ti2p spectra of  $\text{Li}_4\text{Ti}_{5-x}\text{W}_x\text{O}_{12-x}\text{Br}_x$  particles (a)  $x=0$ ; (b)  $x=0.025$ ; (c)  $x=0.050$ ;

(d)  $x=0.100$ .

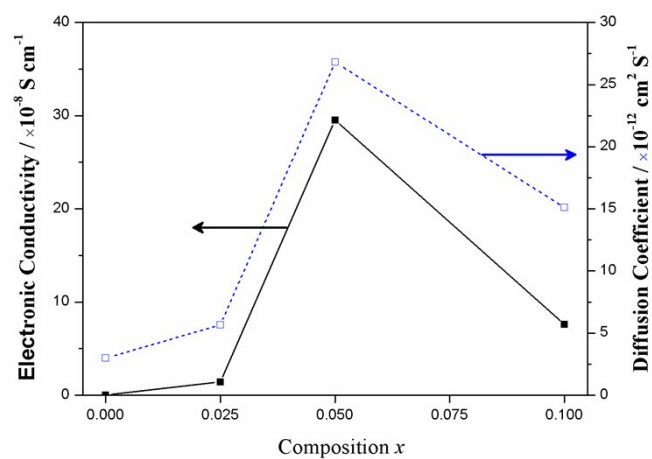

Fig. 3S Variations in electronic conductivity and Li-ion diffusion coefficient with composition x in  $\text{Li}_4\text{Ti}_{5-x}\text{W}_x\text{O}_{12-x}\text{Br}_x$  ( $0 \leq x \leq 0.100$ ).

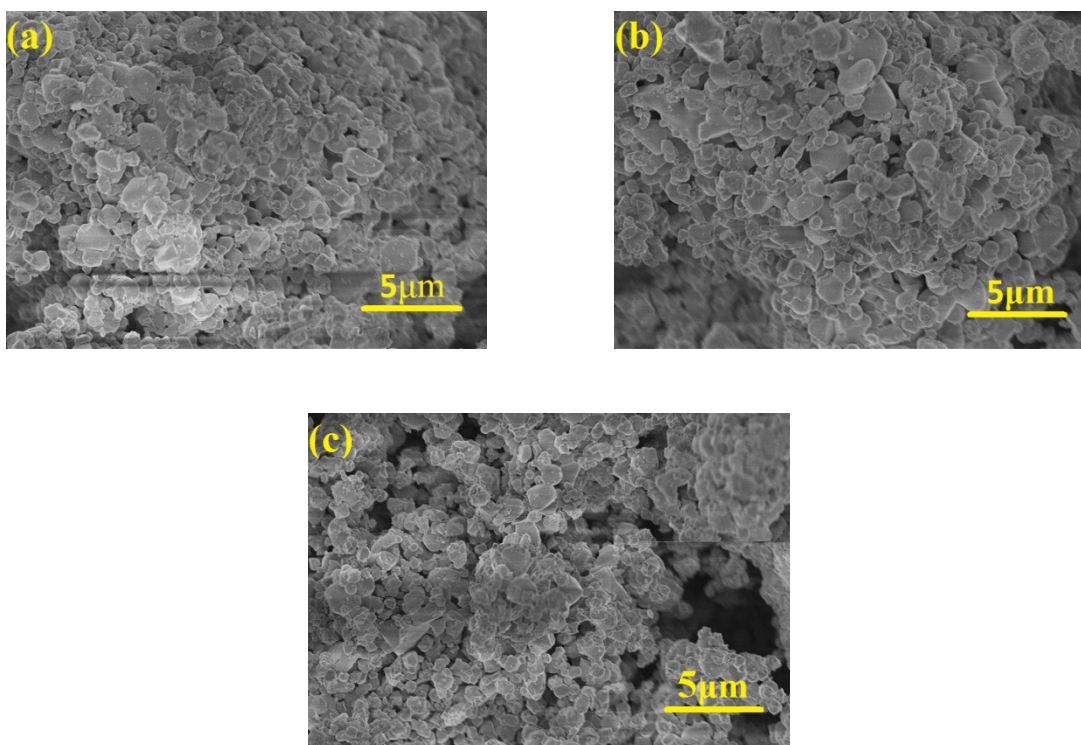

Fig. 4S SEM images of  $\text{Li}_4\text{Ti}_{5-x}\text{W}_x\text{O}_{12-x}\text{Br}_x$  electrode materials after 200 cycles: (a)  $x=0.025$ , (b)  $x=0.050$  and (c)  $x=0.100$ .
